# Supplementary material for: Formulating the bonding contribution equation in heterogeneous catalysis: a quantitative description between the surface structure and adsorption energy
Source: Royal Society of Chemistry journal article supplement (doi:10.1039/c6cp08493a), 2017-01-01
Supplement: c6cp08493a1.pdf [file c6cp08493a1.pdf]

**Formulating the Bonding Contribution Equation in  
Heterogeneous Catalysis: A Quantitative Description  
between Surface Structure and Adsorption Energy**

Ziyun Wang and P. Hu\*

*School of Chemistry and Chemical Engineering, The Queen's University of Belfast,  
Belfast BT9 5AG, U.K.*

**Table S1** The substitution positions ( $p_1$  and  $p_2$ ), solute metals ( $s_1$  and  $s_2$ ), predicted adsorption energies ( $\Delta E_{\text{predict}}$ ), calculated adsorption energies ( $\Delta E_{\text{DFT}}$ ), distances between oxygen atom and three closest surface atoms ( $x_1$ ,  $x_2$  and  $x_3$ ), and adsorption sites (site) of 50 generated two-atom substitution alloy surfaces.

| $p_1$ | $s_1$ | $p_2$ | $s_2$ | $\Delta E_{\text{predict}}$ | $\Delta E_{\text{DFT}}$ | $x_1$ | $x_2$ | $x_3$ | site   |
|-------|-------|-------|-------|-----------------------------|-------------------------|-------|-------|-------|--------|
| type1 | Ir    | type1 | Ir    | -0.57                       | -0.69                   | 2.01  | 2.01  | 2.08  | hollow |
| type2 | Ir    | type4 | Ir    | 0.37                        | 0.31                    | 2.07  | 2.07  | 2.07  | hollow |
| type3 | Ir    | type2 | Ir    | 0.32                        | 0.28                    | 2.04  | 2.06  | 2.06  | hollow |
| type3 | Ir    | type4 | Ir    | 0.20                        | 0.13                    | 2.05  | 2.07  | 2.07  | hollow |
| type1 | Ir    | type1 | Os    | -1.11                       | -1.03                   | 1.96  | 2.07  | 2.10  | hollow |
| type1 | Ir    | type4 | Os    | 0.07                        | -0.10                   | 1.97  | 2.08  | 2.08  | hollow |
| type3 | Ir    | type1 | Os    | -0.75                       | -0.68                   | 1.89  | 2.17  | 2.19  | hollow |
| type3 | Ir    | type4 | Os    | 0.44                        | 0.41                    | 2.04  | 2.06  | 2.06  | hollow |
| type2 | Ir    | type1 | Pd    | 0.20                        | 0.17                    | 2.02  | 2.02  | 2.08  | hollow |
| type2 | Ir    | type4 | Pd    | 0.26                        | 0.32                    | 2.04  | 2.04  | 2.04  | hollow |
| type3 | Ir    | type3 | Pd    | 0.09                        | 0.06                    | 2.04  | 2.05  | 2.05  | hollow |
| type4 | Ir    | type1 | Pd    | 0.08                        | 0.07                    | 2.02  | 2.03  | 2.08  | hollow |
| type3 | Ir    | type3 | Re    | 0.42                        | 0.35                    | 2.04  | 2.08  | 2.08  | hollow |
| type3 | Os    | type1 | Ir    | -0.05                       | -0.21                   | 1.99  | 2.07  | 2.10  | hollow |
| type1 | Os    | type3 | Os    | -0.59                       | -0.71                   | 1.86  | 2.23  | 2.23  | hollow |
| type2 | Os    | type1 | Os    | -0.12                       | -0.43                   | 1.89  | 2.21  | 2.21  | hollow |
| type1 | Os    | type1 | Pd    | -0.87                       | -0.94                   | 1.85  | 2.19  | 2.22  | hollow |
| type1 | Os    | type3 | Pd    | -0.82                       | -0.75                   | 1.89  | 2.17  | 2.18  | hollow |
| type1 | Os    | type4 | Pd    | -0.81                       | -0.73                   | 1.88  | 2.19  | 2.19  | hollow |
| type3 | Os    | type2 | Pd    | 0.27                        | -0.01                   | 2.02  | 2.06  | 2.06  | hollow |
| type3 | Os    | type3 | Pd    | 0.25                        | 0.13                    | 2.03  | 2.06  | 2.07  | hollow |
| type1 | Os    | type3 | Re    | -0.49                       | -0.62                   | 1.91  | 2.16  | 2.18  | hollow |
| type3 | Os    | type3 | Re    | 0.57                        | 0.39                    | 2.06  | 2.07  | 2.09  | hollow |
| type1 | Pd    | type1 | Ir    | -0.33                       | -0.46                   | 1.93  | 2.07  | 2.11  | hollow |
| type1 | Pd    | type3 | Ir    | 0.04                        | 0.05                    | 2.01  | 2.02  | 2.08  | hollow |
| type2 | Pd    | type3 | Ir    | 0.12                        | -0.06                   | 2.03  | 2.05  | 2.05  | hollow |
| type2 | Pd    | type4 | Ir    | 0.16                        | -0.10                   | 2.05  | 2.05  | 2.05  | hollow |
| type1 | Pd    | type2 | Os    | 0.67                        | 0.47                    | 2.03  | 2.03  | 2.11  | hollow |
| type1 | Pd    | type4 | Os    | 0.31                        | 0.29                    | 2.02  | 2.02  | 2.08  | hollow |
| type1 | Pd    | type3 | Pd    | -0.03                       | -0.06                   | 2.01  | 2.02  | 2.06  | hollow |
| type1 | Pd    | type4 | Pd    | -0.02                       | 0.12                    | 2.01  | 2.01  | 2.06  | hollow |
| type4 | Pd    | type3 | Pd    | 0.03                        | 0.09                    | 2.03  | 2.03  | 2.04  | hollow |
| type1 | Pd    | type2 | Re    | 0.97                        | 0.69                    | 2.05  | 2.05  | 2.15  | hollow |
| type1 | Pd    | type3 | Re    | 0.29                        | 0.21                    | 2.00  | 2.04  | 2.11  | hollow |
| type3 | Pd    | type2 | Re    | 1.02                        | 0.73                    | 2.07  | 2.07  | 2.08  | hollow |
| type4 | Pd    | type3 | Re    | 0.36                        | 0.44                    | 2.02  | 2.07  | 2.07  | hollow |
| type3 | Re    | type1 | Ir    | 0.05                        | -0.16                   | 2.00  | 2.06  | 2.12  | hollow |
| type3 | Re    | type4 | Ir    | 0.46                        | 0.26                    | 2.04  | 2.09  | 2.09  | hollow |
| type4 | Re    | type3 | Ir    | 0.59                        | 0.70                    | 2.03  | 2.05  | 2.05  | hollow |
| type3 | Re    | type4 | Os    | 0.69                        | 0.44                    | 2.04  | 2.10  | 2.10  | hollow |
| type4 | Re    | type1 | Os    | -0.33                       | -0.33                   | 1.94  | 2.11  | 2.11  | hollow |
| type2 | Re    | type1 | Pd    | 0.97                        | 0.69                    | 2.05  | 2.05  | 2.15  | hollow |
| type3 | Re    | type3 | Pd    | 0.35                        | 0.23                    | 2.03  | 2.08  | 2.08  | hollow |
| type4 | Re    | type1 | Pd    | 0.46                        | 0.57                    | 2.02  | 2.02  | 2.08  | hollow |
| type3 | Ir    | type1 | Re    | -1.10                       | -1.57                   | 1.71  | 3.36  | 3.36  | top    |
| type4 | Ir    | type1 | Re    | -1.06                       | -1.33                   | 1.72  | 3.27  | 3.27  | top    |
| type2 | Os    | type1 | Re    | -0.47                       | -1.51                   | 1.71  | 3.30  | 3.43  | top    |
| type1 | Re    | type4 | Ir    | -1.06                       | -1.39                   | 1.72  | 3.37  | 3.37  | top    |
| type1 | Re    | type1 | Pd    | -1.22                       | -1.55                   | 1.74  | 2.66  | 2.87  | top    |
| type3 | Re    | type1 | Re    | -0.84                       | -1.67                   | 1.71  | 3.43  | 3.43  | top    |

**Table S2** The substitution positions ( $p_1$ ,  $p_2$  and  $p_3$ ), solute metals ( $s_1$ ,  $s_2$  and  $s_3$ ), predicted adsorption energies ( $\Delta E_{\text{predict}}$ ), calculated adsorption energies ( $\Delta E_{\text{DFT}}$ ), distances between oxygen atom and three closest surface atoms ( $x_1$ ,  $x_2$  and  $x_3$ ), and adsorption sites (site) of 50 generated three-atom substitution alloy surfaces.

| $p_1$ | $s_1$ | $p_2$ | $s_2$ | $p_3$ | $s_3$ | $\Delta E_{\text{predict}}$ | $\Delta E_{\text{DFT}}$ | $x_1$ | $x_2$ | $x_3$ | site   |
|-------|-------|-------|-------|-------|-------|-----------------------------|-------------------------|-------|-------|-------|--------|
| type3 | Os    | type3 | Pd    | type1 | Re    | -0.93                       | -1.13                   | 1.80  | 2.42  | 2.48  | hollow |
| type1 | Re    | type3 | Re    | type3 | Pd    | -0.83                       | -1.12                   | 1.81  | 2.39  | 2.42  | hollow |
| type1 | Ir    | type2 | Ir    | type4 | Ir    | 0.08                        | -0.09                   | 1.98  | 2.09  | 2.09  | hollow |
| type3 | Ir    | type4 | Ir    | type1 | Ir    | -0.08                       | -0.24                   | 1.96  | 2.09  | 2.09  | hollow |
| type3 | Ir    | type4 | Os    | type3 | Ir    | 0.52                        | 0.47                    | 2.05  | 2.05  | 2.07  | hollow |
| type1 | Ir    | type1 | Pd    | type1 | Ir    | -0.61                       | -0.83                   | 1.99  | 1.99  | 2.10  | hollow |
| type1 | Ir    | type2 | Pd    | type3 | Ir    | -0.17                       | -0.45                   | 1.98  | 2.07  | 2.09  | hollow |
| type3 | Ir    | type1 | Pd    | type1 | Os    | -0.79                       | -0.88                   | 1.85  | 2.19  | 2.25  | hollow |
| type1 | Ir    | type4 | Pd    | type1 | Pd    | -0.31                       | -0.37                   | 1.93  | 2.08  | 2.12  | hollow |
| type3 | Ir    | type1 | Pd    | type3 | Pd    | 0.05                        | 0.02                    | 2.01  | 2.03  | 2.08  | hollow |
| type1 | Ir    | type1 | Re    | type2 | Ir    | -1.22                       | -1.17                   | 1.88  | 2.21  | 2.25  | hollow |
| type1 | Ir    | type4 | Re    | type3 | Os    | 0.46                        | 0.14                    | 1.96  | 2.08  | 2.08  | hollow |
| type2 | Ir    | type3 | Re    | type3 | Os    | 0.82                        | 0.51                    | 2.06  | 2.07  | 2.10  | hollow |
| type4 | Ir    | type3 | Re    | type3 | Os    | 0.70                        | 0.30                    | 2.08  | 2.09  | 2.12  | hollow |
| type1 | Ir    | type3 | Re    | type1 | Pd    | 0.01                        | -0.27                   | 1.96  | 2.05  | 2.17  | hollow |
| type1 | Ir    | type3 | Re    | type4 | Pd    | 0.07                        | -0.05                   | 1.99  | 2.06  | 2.12  | hollow |
| type3 | Os    | type3 | Ir    | type4 | Os    | 0.67                        | 0.50                    | 2.05  | 2.09  | 2.10  | hollow |
| type4 | Os    | type3 | Ir    | type1 | Pd    | 0.39                        | 0.39                    | 2.03  | 2.03  | 2.07  | hollow |
| type1 | Os    | type1 | Ir    | type4 | Re    | -0.61                       | -0.69                   | 1.99  | 2.02  | 2.05  | hollow |
| type1 | Os    | type3 | Os    | type3 | Re    | -0.26                       | -0.59                   | 1.93  | 2.17  | 2.18  | hollow |
| type1 | Os    | type3 | Pd    | type2 | Ir    | -0.58                       | -0.62                   | 1.90  | 2.17  | 2.17  | hollow |
| type3 | Os    | type3 | Pd    | type4 | Re    | 0.75                        | 0.72                    | 2.03  | 2.07  | 2.08  | hollow |
| type4 | Pd    | type1 | Ir    | type1 | Ir    | -0.55                       | -0.63                   | 2.01  | 2.01  | 2.09  | hollow |
| type1 | Pd    | type1 | Ir    | type3 | Pd    | -0.31                       | -0.49                   | 1.94  | 2.07  | 2.10  | hollow |
| type1 | Pd    | type3 | Ir    | type4 | Re    | 0.54                        | 0.66                    | 2.02  | 2.02  | 2.07  | hollow |
| type3 | Pd    | type3 | Os    | type2 | Ir    | 0.49                        | 0.32                    | 2.04  | 2.06  | 2.08  | hollow |
| type3 | Pd    | type3 | Os    | type3 | Ir    | 0.33                        | 0.22                    | 2.04  | 2.06  | 2.08  | hollow |
| type4 | Pd    | type3 | Os    | type1 | Pd    | 0.21                        | 0.27                    | 2.00  | 2.03  | 2.10  | hollow |
| type3 | Pd    | type1 | Pd    | type1 | Pd    | -0.07                       | -0.04                   | 1.98  | 2.04  | 2.05  | hollow |
| type3 | Pd    | type4 | Re    | type1 | Ir    | 0.23                        | 0.08                    | 1.97  | 2.06  | 2.06  | hollow |
| type1 | Re    | type1 | Ir    | type3 | Ir    | -1.38                       | -1.27                   | 1.89  | 2.18  | 2.24  | hollow |
| type3 | Re    | type1 | Ir    | type1 | Ir    | -0.23                       | -0.50                   | 1.99  | 2.05  | 2.12  | hollow |
| type3 | Re    | type3 | Ir    | type1 | Ir    | 0.13                        | -0.12                   | 2.00  | 2.07  | 2.11  | hollow |
| type3 | Re    | type1 | Ir    | type1 | Re    | -1.13                       | -1.17                   | 1.90  | 2.15  | 2.22  | hollow |
| type1 | Re    | type4 | Os    | type1 | Ir    | -1.11                       | -1.10                   | 1.93  | 2.13  | 2.19  | hollow |
| type3 | Re    | type1 | Os    | type1 | Pd    | -0.54                       | -0.85                   | 1.83  | 2.26  | 2.27  | hollow |
| type3 | Re    | type4 | Os    | type1 | Pd    | 0.65                        | 0.36                    | 2.02  | 2.04  | 2.13  | hollow |
| type3 | Re    | type1 | Os    | type3 | Re    | -0.16                       | -0.57                   | 1.89  | 2.22  | 2.22  | hollow |
| type3 | Re    | type1 | Pd    | type4 | Ir    | 0.42                        | 0.24                    | 2.07  | 2.07  | 2.08  | hollow |
| type3 | Re    | type2 | Pd    | type3 | Ir    | 0.45                        | 0.17                    | 2.03  | 2.08  | 2.08  | hollow |
| type3 | Re    | type3 | Pd    | type1 | Ir    | 0.06                        | -0.18                   | 1.99  | 2.06  | 2.12  | hollow |
| type3 | Re    | type3 | Pd    | type1 | Os    | -0.48                       | -0.65                   | 1.91  | 2.16  | 2.18  | hollow |
| type4 | Re    | type1 | Re    | type1 | Os    | -1.50                       | -1.19                   | 2.00  | 2.04  | 2.08  | hollow |
| type3 | Ir    | type1 | Pd    | type1 | Re    | -1.14                       | -1.70                   | 1.72  | 3.20  | 3.35  | top    |
| type3 | Ir    | type1 | Re    | type4 | Ir    | -0.98                       | -1.43                   | 1.72  | 3.37  | 3.38  | top    |
| type3 | Ir    | type2 | Re    | type1 | Os    | 0.26                        | -1.52                   | 2.05  | 2.16  | 3.26  | bridge |
| type1 | Os    | type3 | Pd    | type2 | Re    | 0.19                        | -1.44                   | 2.05  | 2.16  | 3.24  | bridge |
| type3 | Pd    | type1 | Re    | type3 | Ir    | -1.09                       | -1.42                   | 1.72  | 3.24  | 3.28  | top    |
| type3 | Re    | type2 | Ir    | type1 | Re    | -0.60                       | -1.61                   | 1.70  | 3.43  | 3.43  | top    |
| type1 | Re    | type3 | Os    | type2 | Ir    | -0.70                       | -1.31                   | 1.71  | 3.29  | 3.42  | top    |

## **Negative Adsorption Influence of the Second Neighbour**

In the manuscript, we showed that a substitution of first neighbour atom to the adsorbate (type I) has a positive adsorption influence (i.e. a substitution with an intrinsically more active solute metal will enhance the adsorption), while a substitution of second neighbour atom (type II, type III or type IV) has a negative influence of adsorption energy. This phenomenon can be understood as follows: The first neighbour atom directly bonds with the adsorbates. Therefore, a substitution with an intrinsically more active metal can enhance the bonding between adsorbate and the adsorption site atom. On the other hands, the second neighbour atom affects the adsorption energy via the first neighbour atom. A second neighbour substitution with an intrinsically more active solute metal will increase the bonding between the substituted second neighbour atom and the first neighbour atom. Due to this competing bonding, the interaction between the adsorbate and the first neighbour atom will decrease.

### **Example of Calculating the Generalized Parameter**

For a substitution of type I (BCCF of 7/27, Equation 2 in manuscript) with an Os atom with the intrinsic bonding ability of -1.17 eV, the O adsorption energy of oxygen atom is changed by -0.75 eV, based on which the generalized parameter of Os can be calculated to be  $-0.75/-1.17/(7/27) = 2.47$ . The value 2.75 in the manuscript was obtained by averaging all the generalized parameters of the solute metals from the substitutions of type I.
